# Supplementary material for: The transcriptomic signature of fasting murine liver
Source: PubMed Central journal article supplement (PMC2588605; doi:10.1186/1471-2164-9-528), 2008-11-06
Supplement: 1471-2164-9-528-S3.pdf [file 1471-2164-9-528-S3.pdf]

## Enzymes

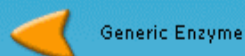

Generic Enzyme

### KINASE

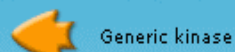

Generic kinase

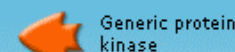

Generic protein kinase

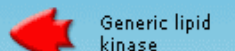

Generic lipid kinase

### PHOSPHATASE

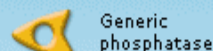

Generic phosphatase

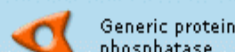

Generic protein phosphatase

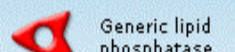

Generic lipid phosphatase

### PHOSPHOLIPASE

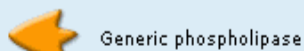

Generic phospholipase

### PROTEASE

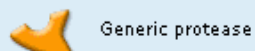

Generic protease

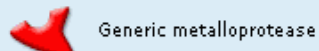

Generic metalloprotease

### GTPase

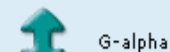

G-alpha

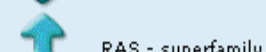

RAS - superfamily

## G protein Adaptor/regulators

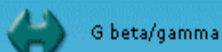

G beta/gamma

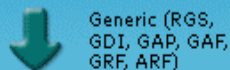

Generic (RGS, GDI, GAP, GAF, GRF, ARF)

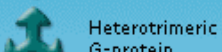

Heterotrimeric G-protein

## Channels/Transporters

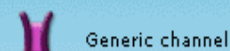

Generic channel

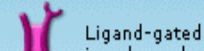

Ligand-gated ion channel

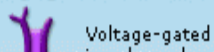

Voltage-gated ion channel

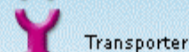

Transporter

## Blocks

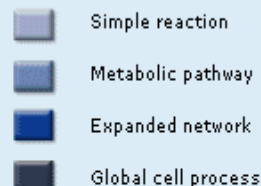

## Arrows

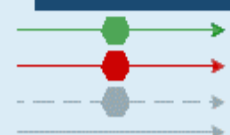

## Generic classes

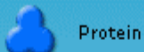

Protein

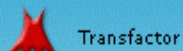

Transfactor

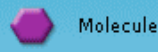

Molecule

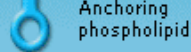

Anchoring phospholipid

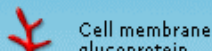

Cell membrane glycoprotein

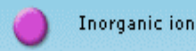

Inorganic ion

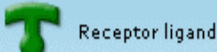

Receptor ligand

## Adaptors/regulators

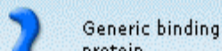

Generic binding protein

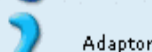

Adaptor

## Receptors

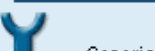

Generic

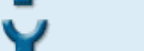

GPCR

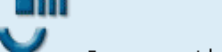

Receptors with kinase activity

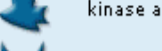

Nuclear receptor

## Localization

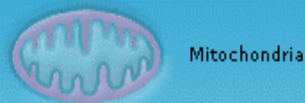

Mitochondria

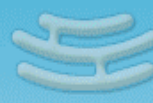

EPR

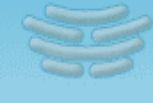

Golgi

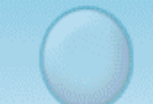

Nucleus

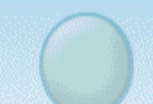

Lysosome

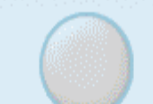

Peroxisome

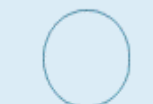

Unspecified

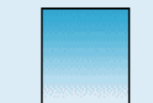

Cytoplasm

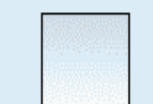

Extracellular

## Mechanisms

**A** Allosteric regulation

**B** Binding

**C** Cleavage

**CM** Covalent modifications

**Cn** Competition

**Hy** Hydrolysis

**+P** Phosphorylation

**-P** Dephosphorylation

**Pr** Protein processing stage

**Ra** Active center binding

**Rr** Reg center binding

**T** Transformation

**Tn** Translocation

**X** Exchange

**Z** Catalysis

Group of similar objects
